# Supplementary material
Source: PubMed Central journal article supplement (PMC5222987)

A

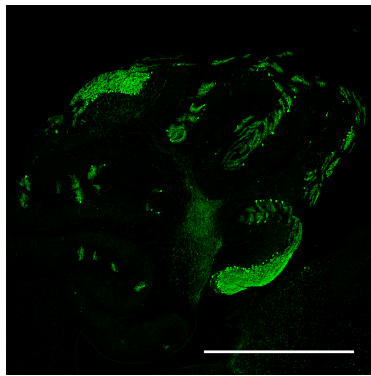

B

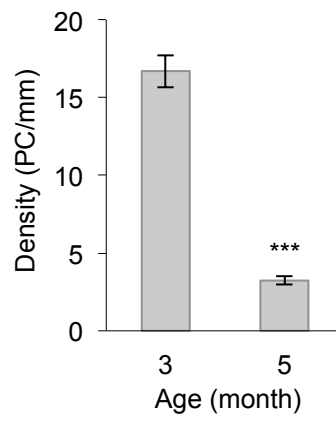

Supplement: mmc1.pdf [file mmc1.pdf]
